# Supplementary material for: The distinct phenotypic signatures of dispersal and stress in an arthropod model: from physiology to life history
Source: Oxford University Press journal article supplement (doi:10.1242/jeb.203596), 2019-01-01
Supplement: jeb203596supp.pdf [file jeb203596supp.pdf]

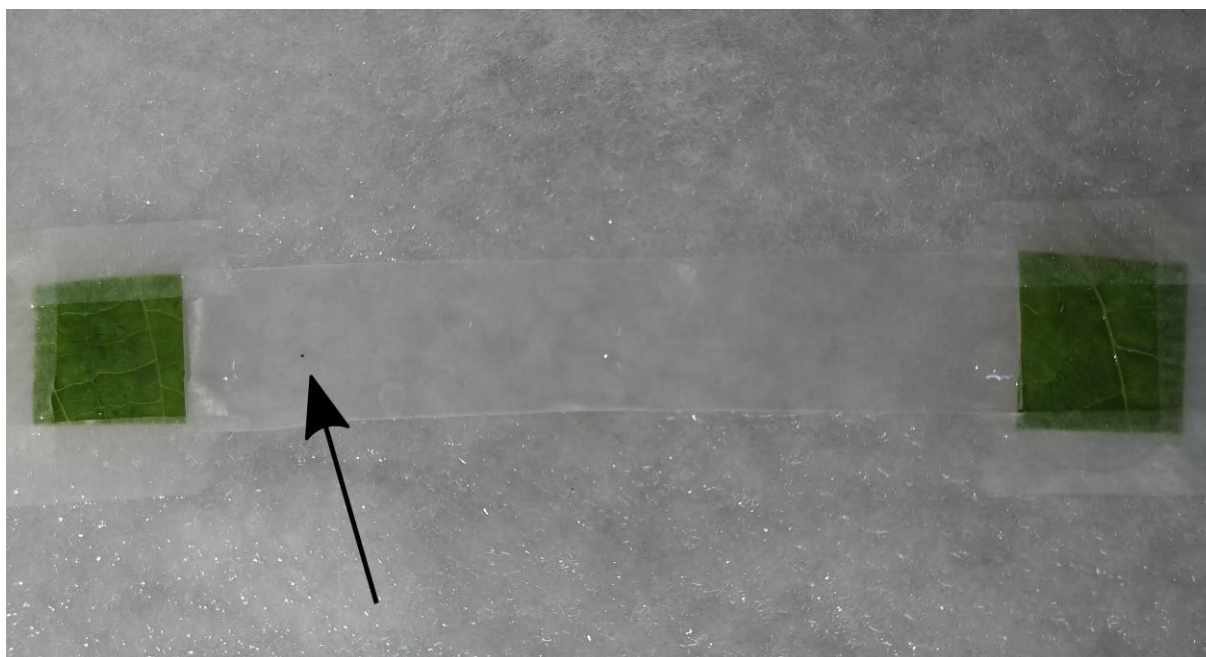

**Figure S1.** Example of dispersal bridge used in this study's experiment (photograph: Stefano Masier). Two 2 × 2 cm bean leaf squares are connected by a parafilm bridge (Note: the bridge on this demonstration photograph is longer than the bridges used in this study). The arrow points to a single *Tetranychus urticae* female on the bridge.

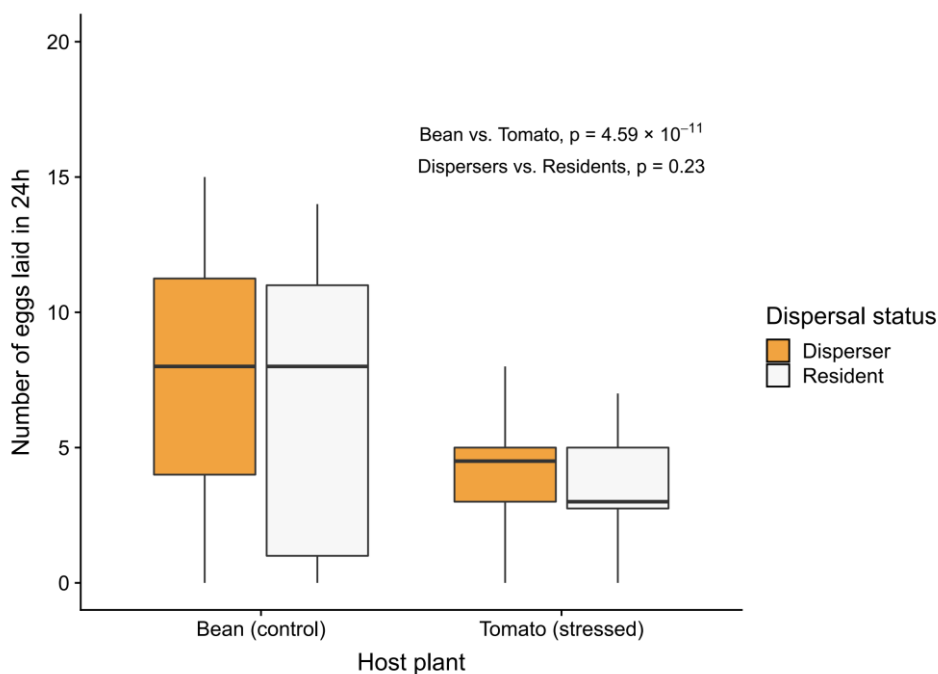

**Figure S2.** Effect of dispersal status and host plant on fecundity, measured as the number of eggs laid in the first 24h of Experiment 1. Dispersal effect:  $X^2 = 1.47$ ,  $df = 1$ ,  $p = 0.23$  ; Host plant effect:  $X^2 = 43.34$ ,  $df = 1$ ,  $p = 4.59 \times 10^{-11}$ ; Interaction effect:  $X^2 = 0.00$ ,  $df = 1$ ,  $p = 0.95$  (quasi-Poisson GLM).

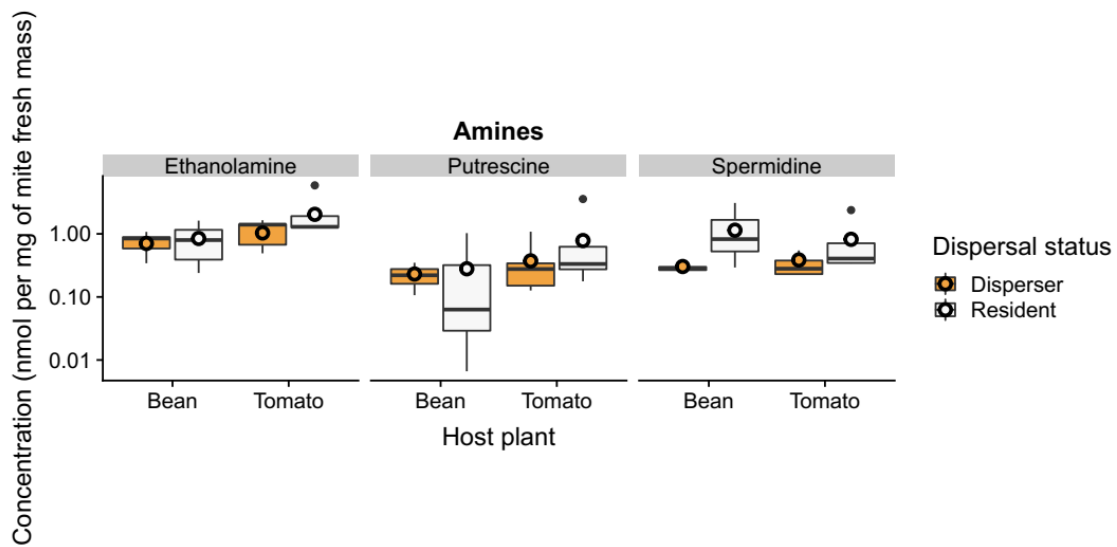

**Figure S3.** Observed amine concentrations in Experiment 2. Box and black dots: observed values, coloured dots: predicted means based on fixed and random effects of the model presented Table 2 of the main text. Predictions are based on relative concentrations (mean value = 1) and back-transformed to actual concentrations using observed means. Number of replicates = 5, 6, 5 and 4 for Dispersers on Bean, Residents on Bean, Dispersers on Tomato and Residents on Tomato, respectively. Each replicate was made of 50 adult female mites.

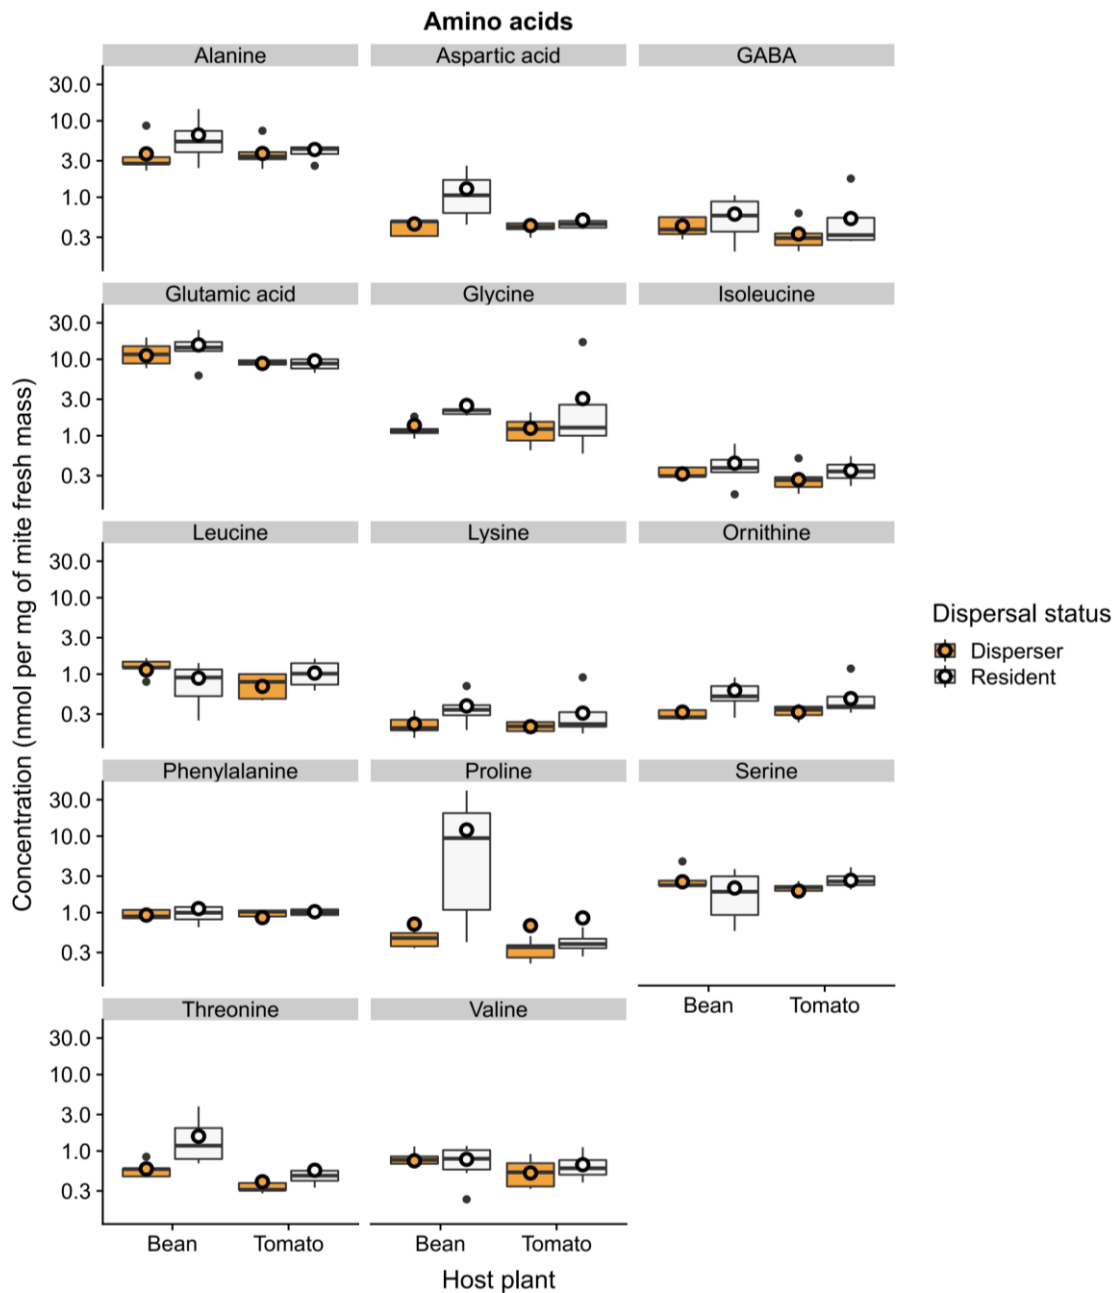

**Figure S4.** Observed amino acid concentrations in Experiment 2. Box and black dots: observed values, colored dots: predicted means based on fixed and random effects of the model presented Table 2 of the main text. Predictions are based on relative concentrations (mean value = 1) and back-transformed to actual concentrations using observed means. Number of replicates = 5, 6, 5 and 4 for Dispersers on Bean, Residents on Bean, Dispersers on Tomato and Residents on Tomato, respectively. Each replicate was made of 50 adult female mites.

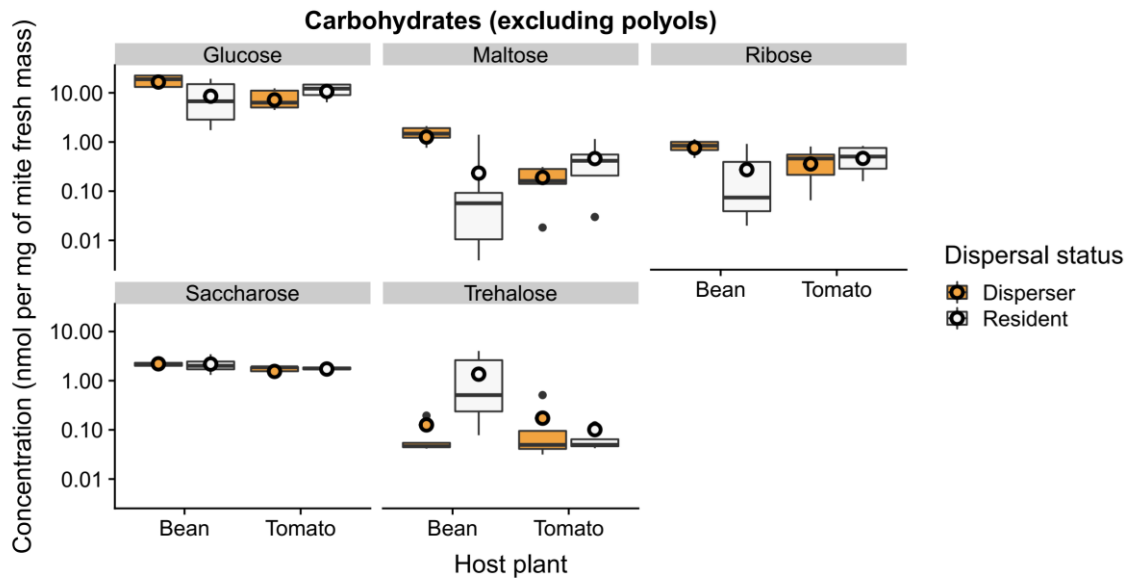

**Figure S5.** Observed carbohydrates concentrations in Experiment 2 (excluding polyols). Box and black dots: observed values, colored dots: predicted means based on fixed and random effects of the model presented Table 2 of the main text. Predictions are based on relative concentrations (mean value = 1) and back-transformed to actual concentrations using observed means. Number of replicates = 5, 6, 5 and 4 for Dispersers on Bean, Residents on Bean, Dispersers on Tomato and Residents on Tomato, respectively. Each replicate was made of 50 adult female mites.

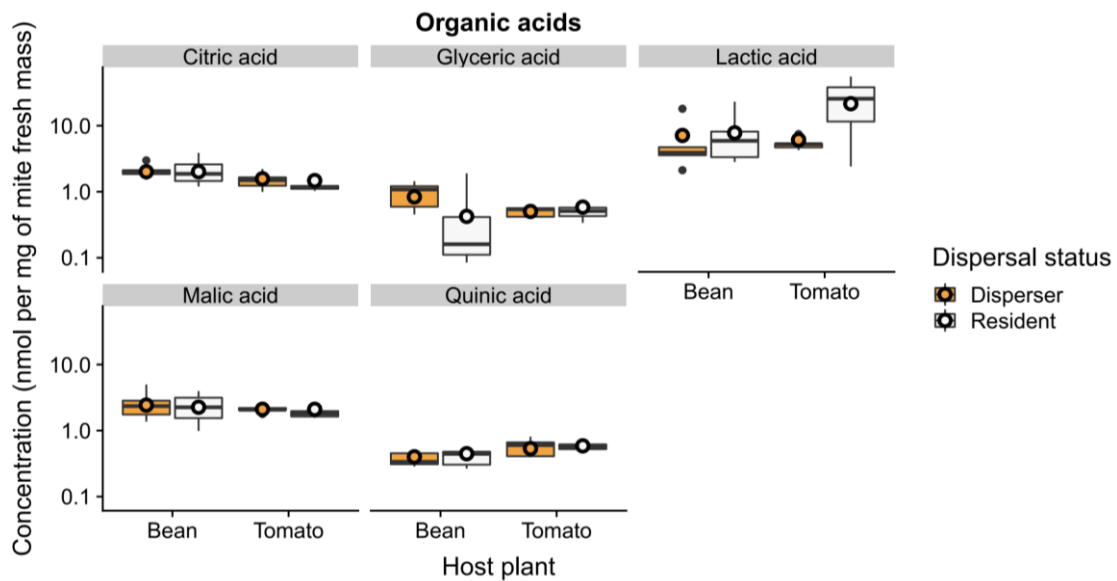

**Figure S6.** Observed organic acid concentrations in Experiment 2. Box and black dots: observed values, colored dots: predicted means based on fixed and random effects of the model presented Table 2 of the main text. Predictions are based on relative concentrations (mean value = 1) and back-transformed to actual concentrations using observed means. Number of replicates = 5, 6, 5 and 4 for Dispersers on Bean, Residents on Bean, Dispersers on Tomato and Residents on Tomato, respectively. Each replicate was made of 50 adult female mites.

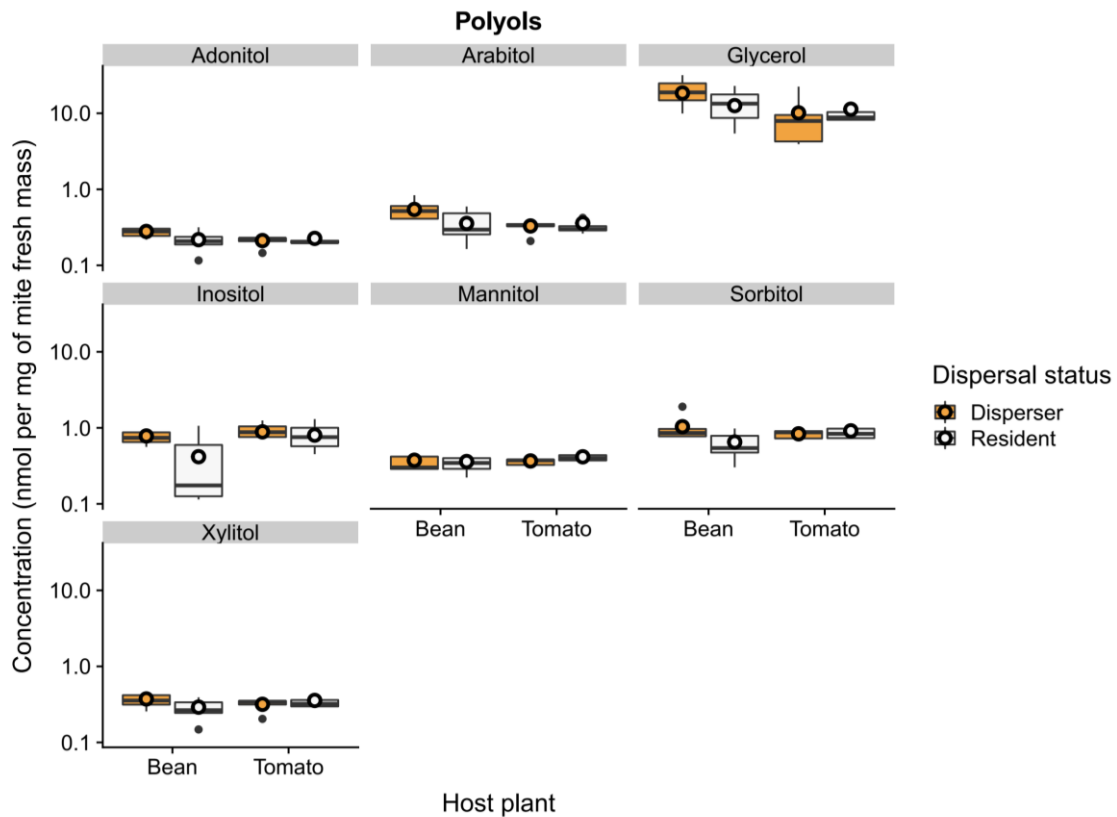

**Figure S7.** Observed polyol concentrations in Experiment 2. Box and black dots: observed values, colored dots: predicted means based on fixed and random effects of the model presented Table 2 of the main text. Predictions are based on relative concentrations (mean value = 1) and back-transformed to actual concentrations using observed means. Number of replicates = 5, 6, 5 and 4 for Dispersers on Bean, Residents on Bean, Dispersers on Tomato and Residents on Tomato, respectively. Each replicate was made of 50 adult female mites.

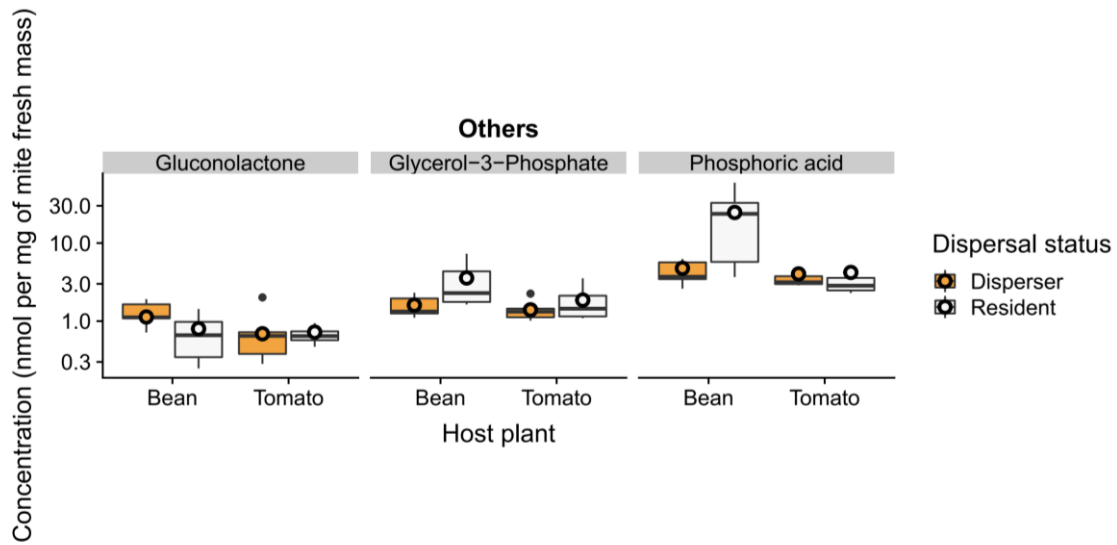

**Figure S8.** Observed concentrations in Experiment 2 of the three quantified molecules not belonging to any of the main categories shown in Supplementary Figures 3-7. Box and black dots: observed values, colored dots: predicted means based on fixed and random effects of the model presented Table 2 of the main text. Predictions are based on relative concentrations (mean value = 1) and back-transformed to actual concentrations using observed means. Number of replicates = 5, 6, 5 and 4 for Dispersers on Bean, Residents on Bean, Dispersers on Tomato and Residents on Tomato, respectively. Each replicate was made of 50 adult female mites.
